# Supplementary material for: Bacterial fitness in chronic wounds appears to be mediated by the capacity for high-density growth, not virulence or biofilm functions
Source: PubMed Central journal article supplement (PMC6448920; doi:10.1371/journal.ppat.1007511), 2019-03-20

S6 Fig.

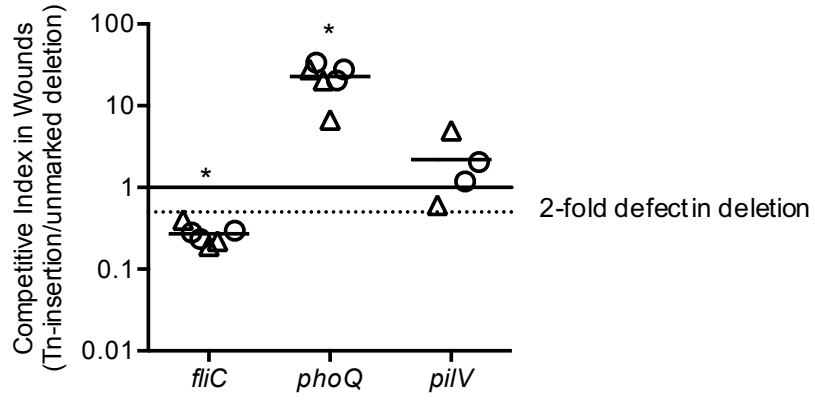

Supplement: ppat.1007511.s006.pdf [file ppat.1007511.s006.pdf]
